# Supplementary material for: Investigating the long-term effects of efavirenz in South African waters on the liver and kidney of the red strain Mozambique tilapia
Source: Research Square preprint supplement (doi:10.21203/rs.3.rs-7647785/v1), 2025-11-26
Supplement: Supplementary file 1 [file 9b8a967c637d5360d6f6aeea.xlsx]

## Sheet: Water
WATER QUALITY PARAMETERS
Tank #	Groups	Replicates	Temp (°C)	Cond (μS/cm)	TDS (mg/L)	O2 (mg/L)	O2 (%)	pH
Tank 1	Blank Control	1	28.3704	217.333	103.704	7	87.2	7.11667
Tank 2	Blank Control	1	28.2481	215.111	96.75	7.4	88.4	7.1
Tank 3	Blank Control	1	28.2	215.852	102.667	7.08	84.6	7.1
Tank 4	Solvent Control	1	28.2852	217.778	104.111	7.63	87.5	7.05
Tank 5	Solvent Control	1	28.0231	225.926	108.148	7.02	85	7.05
Tank 6	Solvent Control	1	28.0185	217.074	103.333	7.08	83.3	6.98333
Tank 7	10.3 ng/L EFV	1	27.8852	232.222	110.852	7.29	88	6.95
Tank 8	10.3 ng/L EFV	1	28.0074	229.63	109.667	7.14	87	7.01667
Tank 9	10.3 ng/L EFV	1	27.4852	224.111	106.556	6.92	86.3	7.03333
Tank 10	20.6 ng/L EFV	1	27.2667	221.37	105.556	7	86	7.01667
Tank 11	20.6 ng/L EFV	1	27.1259	221.889	105.889	7.11	86.1	7.05
Tank 12	20.6 ng/L EFV	1	27.2111	224.538	107.111	7.09	83.9	7.13333
Tank 1	Blank Control	2	28.7786	240.571	115.107	7.67	98	7.99143
Tank 2	Blank Control	2	28.8464	244.107	116.25	7.37	96.6	8.00143
Tank 3	Blank Control	2	28.8143	240.143	114.821	7.31	99.3	8.02643
Tank 4	Solvent Control	2	28.8357	244.571	116.357	7.77	98.8	7.98143
Tank 5	Solvent Control	2	28.6607	224.036	106.893	7.55	97.6	8.04536
Tank 6	Solvent Control	2	28.7464	226.679	107.929	7.9	95.4	7.90286
Tank 7	10.3 ng/L EFV	2	28.7143	226.536	108	7.5	97.5	7.84107
Tank 8	10.3 ng/L EFV	2	28.7357	225.214	107.357	7.59	98.9	7.97714
Tank 9	10.3 ng/L EFV	2	28.3536	232.714	110.857	7.5	98.2	7.97607
Tank 10	20.6 ng/L EFV	2	28.325	232.214	110.893	7.62	102.4	7.955
Tank 11	20.6 ng/L EFV	2	28.3464	231.714	110.857	7.68	104	8.01179
Tank 12	20.6 ng/L EFV	2	28.525	233.679	111.286	7.6	100	8.00107
Tank 1	Blank Control	3	28.3302	225.135	107.211	8.12	95	8.55714
Tank 2	Blank Control	3	28.08	223.679	107.071	8.2	96	8.54414
Tank 3	Solvent Control	3	27.9471	224	107.033	7.97	95.2	8.55133
Tank 4	Solvent Control	3	28.0571	227.179	108.276	7.99	94.9	8.15069
Tank 5	10.3 ng/L EFV	3	27.9448	225.9	107.645	7.94	95.8	8.37107
Tank 6	10.3 ng/L EFV	3	27.9031	223.7	106.8	8	94.1	8.44367
Tank 7	10.3 ng/L EFV	3	27.8257	227.515	108.125	7.89	94.6	8.435
Tank 8	10.3 ng/L EFV	3	27.8606	228.647	109.312	7.88	95.2	8.41063
Tank 9	20.6 ng/L EFV	3	27.7324	206.052	108.765	8.05	95.6	8.38258
Tank 10	20.6 ng/L EFV	3	27.6212	227.485	108.1	7.97	95.2	8.41393
Tank 11	20.6 ng/L EFV	3	27.5742	229.647	109.167	7.97	93.6	8.36257
Tank 12	20.6 ng/L EFV	3	27.6516	229.088	109.433	8.01	95.6	8.43114
