# Supplementary material for: Investigating the long-term effects of efavirenz in South African waters on the liver and kidney of the red strain Mozambique tilapia
Source: Research Square preprint supplement (doi:10.21203/rs.3.rs-7647785/v1), 2025-11-26
Supplement: Supplementary file 2 [file 9c23adbda1c0fda2c24d5503.xlsx]

## Sheet: Water Samples
Water Samples Analysis Results
Specimen ID	Group	Tank #	Sampling point	EFV (ng/L)
1	Control	1	1 Hr	5.1
2	Control	2	1 Hr	< 5,0
3	Solvent	3	1 Hr	< 5,0
4	Solvent	4	1 Hr	< 5,0
9	Hi Conc	9	1 Hr	19.9
11	Hi Conc	11	1 Hr	19.5
12	Hi Conc	12	1 Hr	21.1
13	Control	1	48 Hrs	3.6
14	Control	2	48 Hrs	3.5
15	Solvent	3	48 Hrs	< 5,0
16	Solvent	4	48 Hrs	2.2
21	Hi Conc	9	48 Hrs	13
23	Hi Conc	11	48 Hrs	10.1
24	Hi Conc	12	48 Hrs	13.8
25	Control	1	96 Hrs	< 5,0
26	Control	2	96 Hrs	3.3
27	Solvent	3	96 Hrs	< 5,0
28	Solvent	4	96 Hrs	4.1
33	Hi Conc	9	96 Hrs	10.4
35	Hi Conc	11	96 Hrs	10.4
36	Hi Conc	12	96 Hrs	9.1
37	Control	1	97 Hr	4.5
38	Control	2	97 Hr	< 5,0
39	Solvent	3	97 Hr	7.5
40	Solvent	4	97 Hr	5.5
45	Hi Conc	9	97 Hr	30.6
47	Hi Conc	11	97 Hr	23.2
48	Hi Conc	12	97 Hr	30.8
49	Control	1	28 days	3
50	Control	2	28 days	4.4
51	Solvent	3	28 days	4.3
52	Solvent	4	28 days	5.6
57	Hi Conc	9	28 days	23.1
58	Hi Conc	10	28 days	22.2
59	Hi Conc	11	28 days	18.9
60	Hi Conc	12	28 days	22
	Hi Conc = 20,6 ng/L EFV

## Sheet: Liver Samples
Liver Samples Analysis Results
Specimen ID	Fish #	Gender	Group	EFV (mg/Kg)
1	1 + 3	Males	Control	9.8
2	4 + 6	Females	Control	15.8
3	7 + 9	Males	Solvent	15.2
4	10 + 12	Females	Solvent	16.8
5	14 + 18	Females	Lo Conc	23.3
6	15 + 17	Males	Lo Conc	33.7
7	19 + 21	Males	Hi Conc	47.3
8	20 + 22	Females	Hi Conc	24.2
9	23 + 24	M & F	Hi Conc	37.7
10	25 + 27	Males	Control	14.6
11	28 + 30	Females	Control	7.8
12	32 + 34	Females	Solvent	16
13	33 + 35	Males	Solvent	13.9
14	37 + 39	Males	Lo Conc	18.7
15	38 + 40	Females	Lo Conc	23.5
16	41 + 43	Males	Hi Conc	29.4
17	42 + 46	Females	Hi Conc	25.1
18	44 + 47	Males	Hi Conc	84
19	45 + 48	M & F	Hi Conc	54.6
20	49 + 51	Males	Control	11.3
21	50 + 52	Females	Control	9.7
22	55 + 57	Males	Solvent	17.3
23	56 + 58	Females	Solvent	14.2
24	61 + 62	Females	Lo Conc	19
25	59 + 60	Females	Lo Conc	33.7
26	64 + 65	Females	Lo Conc	28.1
27	67 + 69	Males	Hi Conc	20.7
28	68 + 70	Females	Hi Conc	23.5
29	71 + 72	M & F	Hi Conc	39.1
30	16	Male	Lo Conc	30.3
All the samples are represented. `The samples were pooled (same sex) to have all groups represented. The M + F the pair is a male and a female
Lo Conc =	10.3 ng/L EFV
Hi Conc =	20.6 ng/L EFV
